# Supplementary material
Source: PubMed Central journal article supplement (PMC3908943)

## **Supplemental Material to:**

**Riku Okuhata, Yuki Otsuka, Takahide Tsuchiya and  
Nobuyuki Kanzawa**

**Mutagenesis of apyrase conserved region 1 alters the  
nucleotide substrate specificity.**

**Plant Signaling & Behavior 2013; 8(5)**

**<http://dx.doi.org/10.4161/psb.24131>**

**[www.landesbioscience.com/journals/psb/article/24131](http://www.landesbioscience.com/journals/psb/article/24131)**

### **Supplemental Figure legends**

Supplemental Figure 1 Expression of recombinant proteins. Recombinant proteins of WT-MP67 (A), S63A-MP67 mutant (B), WT-*Mp*APY2 (C) and S63A-*Mp*APY2 mutant (D) without the transmembrane domain were induced in bacterial cells with (+) or without (-) 1 mM isopropyl b-D-1-thiogalactopyranoside. M, Molecular mass marker. Recombinant proteins were purified from inclusion bodies of the cell lysate by a nickel affinity column. Exact procedures for the expression and purification were reported in the previous paper.(ref)

**A**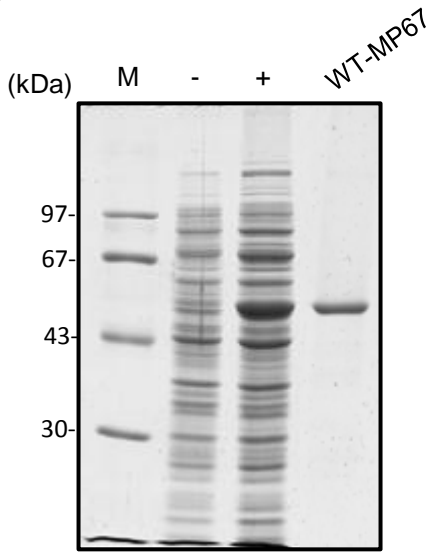**B**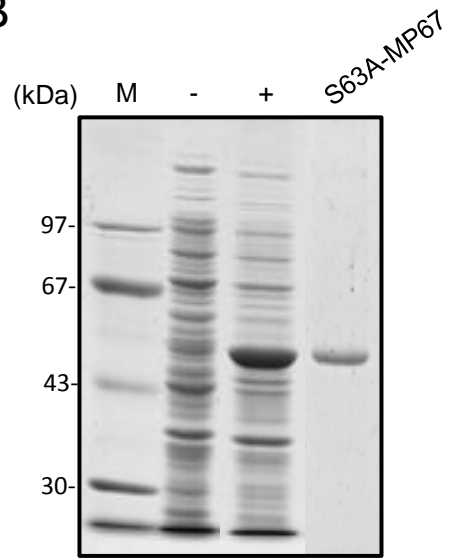**C**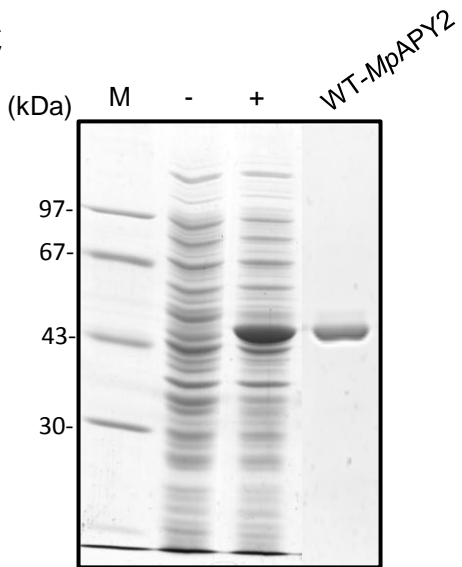**D**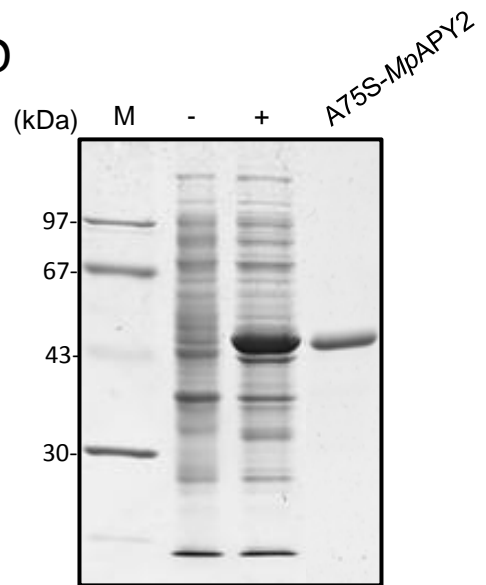

Supplement: psb-8-e24131-s01.pdf [file psb-8-e24131-s01.pdf]
